# Supplementary material for: Endothelial Microparticles and Systemic Complement Activation in Patients With Chronic Kidney Disease
Source: PubMed Central journal article supplement — J Am Heart Assoc. 2018 Jul 13;7(14):e007818. doi: 10.1161/JAHA.117.007818 (PMC6064828; doi:10.1161/jaha.117.007818), 2018-07-13
Supplement: JAH3-7-e007818-s001.pdf [file JAH3-7-e007818-s001.pdf]

# **SUPPLEMENTAL MATERIAL**

**Figure S1. The size of microparticles was analyzed in patient plasma before and after purification.**

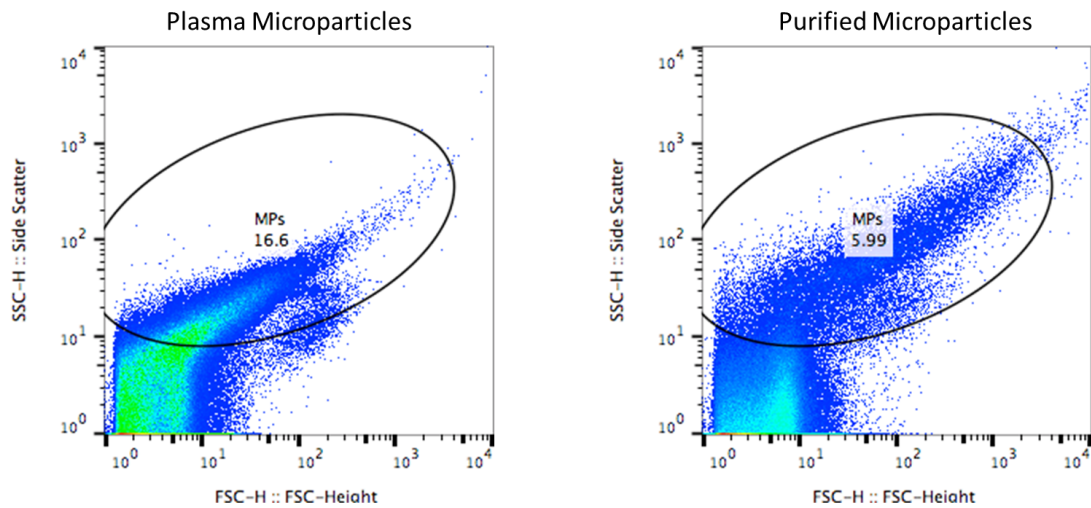

Although the percentage of microparticles that fell within the microparticle gate used for further analysis (MPs) decreased, the average size of the microparticles within the gate increased after ultracentrifugation.

**Figure S2. Generation of an inhibitory antibody to factor D.**

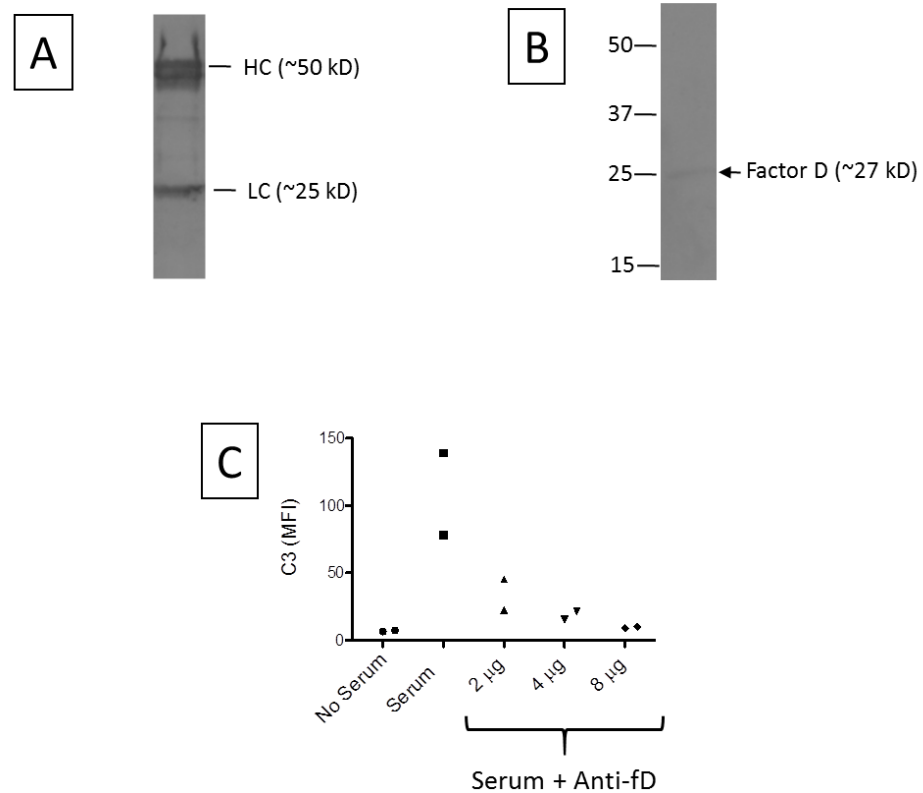

We immunized a factor D deficient mouse with purified human factor D. We generated hybridomas from the mouse and screened them for those that bound factor D by ELISA. **A)** One of the reactive antibodies was purified by affinity chromatography with protein G examined by Coomassie staining. **B)** The antibody also bound to factor D by Western blot analysis. **C)** Alternative pathway activity in serum was measured by a zymosan activation assay. The addition of increasing concentrations of the antibody to normal human serum led to nearly complete inhibition of the alternative pathway.
